# Supplementary material for: Short communication: On the potential use of materials with heterogeneously distributed parent and daughter isotopes as primary standards for non-U-Pb geochronological applications of laser ablation inductively coupled mass spectrometry (LA-ICP-MS)
Source: Copernicus journal article supplement (doi:10.5194/gchron-2021-37), 2021-12-23
Supplement: Supplementary file [file gchron-2021-37-AC1-supplement.pdf]

Equations 15 and 16 in the manuscript should read as follows:

$$a = \sigma_{Y_0}^2 \left( \frac{-1}{e^{\lambda t} - 1} \left( \frac{1}{Nx_1} + \dots + \frac{1}{Nx_N} \right) \right)^2 + \frac{2\sigma_{Y_0,t}\lambda k_{av}}{(e^{\lambda t} + e^{-\lambda t} - 2)} \left( \frac{1}{Nx_1} + \dots + \frac{1}{Nx_N} \right), \quad (15)$$

$$a = \sigma_{Y_0'}^2 \left( \frac{-1}{Y_0'^2(1 - e^{\lambda t})} \left( \frac{y_1'}{Nx_1'} + \dots + \frac{y_N'}{Nx_N'} \right) \right)^2 + \frac{2\sigma_{Y_0',t}\lambda k_{av}}{Y_0'^2(2 - e^{\lambda t} - e^{-\lambda t})} \left( \frac{y_1'}{Nx_1'} + \dots + \frac{y_N'}{Nx_N'} \right), \quad (16)$$

Equation 12 in the manuscript should read as follows:

$$\sigma_{Y_0',t} = -\frac{\sigma_{Y_0,t}}{Y_0^2} = \sigma_{Y_0'}^2 \frac{1 + X'^*(1 - e^{\lambda t})}{\lambda X'^* Y_0' e^{\lambda t}}, \quad (12)$$
